# Supplementary material for: Integrated Analysis of Residue Coevolution and Protein Structure in ABC Transporters
Source: PubMed Central journal article supplement (PMC3348156; doi:10.1371/journal.pone.0036546), 2012-05-08
Supplement: pone.0036546.s015.pdf [file pone.0036546.s015.pdf]

## Text S1: Heuristic Search Strategy for the Optimal Parameter Set $\theta^*$

Supporting the manuscript *Integrated Analysis of Residue Coevolution and Protein Structure in ABC Transporters* by Attila Gulyás-Kovács

As in the main text and Figure 2A, let  $\{X_n\}$  be the set of  $N$  coevolution detectors selected for this study and  $\{C_k\}$  the set of  $K$  substitution rate classes of position pairs ( $n = 1, \dots, N$  and  $k = 1, \dots, K$ ). For a given  $X_n$  and  $C_k$  let  $t_k^{X_n}$  be the adjustable threshold and  $s_k^{X_n}$  the number of sequences remaining in the alignment after filtering. (Figure 2A shows a special case when  $s_k \equiv s_k^{X_1} = \dots = s_k^{X_N}$ .) As explained in the main text, the set of predicted pairs  $P_k$ , for some  $C_k$ , is a function of  $(t_k^{X_1}, s_k^{X_1}, \dots, t_k^{X_N}, s_k^{X_N})$  in the general case when all  $N$  detectors are combined. The present optimization problem concerns the parameter set  $\theta$  given by the Cartesian product

$$\theta = \prod_{n,k} (t_k^{X_n}, s_k^{X_n}), \quad (\text{S1})$$

where  $n$  and  $k$  take values independently from each other in  $\{1, \dots, N\}$  and  $\{1, \dots, K\}$ , respectively.

In this study  $K = 10$  and  $N = 11$ , so the parameter space  $\Theta$  has a dimension  $\dim \Theta = 219$  with (and 220 without) the constraint (cf. eq. 13 of the main text) that

$$\sum_{k=1}^K p_k = \gamma |\Omega|, \quad (\text{S2})$$

where  $p_k \equiv |P_k|$  is the number of predicted pairs in class  $C_k$ , and  $\gamma$  and  $\Omega$  have the same meaning as in the main text.

The present heuristic strategy searches for the optimal  $\theta^*$  in multiple steps. In each step some parameters are fixed in order to reduce  $\dim \Theta$ .

Before the optimization steps are discussed a few definitions and notational conventions need to be introduced. Given class  $C_k$ , the set  $S$  of structural contact pairs and the set  $B$  of structurally distant pairs, the following definitions are made:

$$b_k(\theta) = |B \cap P_k(\theta)| \quad (\text{S3})$$

$$\rho_k^{\text{FP}}(\theta) = \frac{b_k(\theta)}{|B \cap C_k|} \quad (\text{S4})$$

$$\rho_k^{\text{TP}}(\theta) = \frac{|S \cap P_k(\theta)|}{|S \cap C_k|} \quad (\text{S5})$$

$$A_k(\alpha_k, \theta) = \int_0^{\alpha_k} \rho_k^{\text{TP}}(\theta) d\rho_k^{\text{FP}}(\theta). \quad (\text{S6})$$

(Like  $\alpha$  in the main text,  $\alpha_k \in [0, 1]$ .) Thus  $\rho_k^{\text{TP}}$ ,  $\rho_k^{\text{FP}}$  and  $A_k$  are the class-specific versions of  $\rho^{\text{TP}}$ ,  $\rho^{\text{FP}}$  and  $A$  (eq. 16-18 of the main text). As eq. S4-S6 show, these quantities are functions of the parameter set  $\theta$ . From this point on the notation  $A_k(\alpha_k, x) \equiv A_k(\alpha_k, \theta)$  will express that only some subset  $x \subset \theta$  of the parameters are varied while all other parameters are fixed.  $\rho^{\text{TP}}(x)$  and  $\rho^{\text{FP}}(x)$  have analogous meanings.

## Step I and II

In step I the optimal solution  $[s_k^{X_n}]^*$  for each  $C_k$  and  $X_n$  is obtained as

$$[s_k^{X_n}]^* = \arg \max_{s_k^{X_n}} A(\alpha_k = 0.1, s_k^{X_n}). \quad (\text{S7})$$

In all subsequent steps each  $s_k^{X_n}$  is held fixed at  $[s_k^{X_n}]^*$ . This step reduces  $\dim \Theta$  to 109.

In step II all but the two best performing detectors are discarded, further reducing  $\dim \Theta$  to 19. In the present study this operation is justified by the result that the two best performing detectors, CoMap and Mip, in general greatly outperformed all other detectors (Figure S5-9). However in this general discussion the two best performing detectors are denoted as  $X_1$  and  $X_2$  and their combination as  $X_1 \wedge X_2$ .

## Step III

The remaining set of 20 parameters is  $\{(t_k^{X_1}, t_k^{X_2})\}$  ( $k = 1, \dots, K$  and  $n = 1, 2$ ). This set corresponds to 19 free parameters, since the constraint in eq. S2 still stands. Write  $\mathbf{t}_k \equiv (t_k^{X_1}, t_k^{X_2})$ . For each  $k$  fix  $b_k$  and allow  $\mathbf{t}_k$  to vary. Note that it is possible not to alter  $b_k$  if  $t_k^{X_1}$  and  $t_k^{X_2}$  shift in the opposite direction (Figure 2A). For a given  $b_k$  define the optimal solution  $\mathbf{t}_k^\circ$  as

$$\mathbf{t}_k^\circ = \arg \max_{\mathbf{t}_k} \rho_k^{\text{TP}}(\mathbf{t}_k). \quad (\text{S8})$$

Note that  $\mathbf{t}_k^\circ$  is a function of  $b_k$ . But  $b_k = \rho_k^{\text{FP}} |B \cap C_k|$  (eq. S4) and so  $\mathbf{t}_k^\circ$  can also be considered as a function of the false positive rate  $\rho_k^{\text{FP}}$ . This implies that eq. S8 can be reformulated as

$$\mathbf{t}_k^\circ(\alpha_k) = \arg \max_{\mathbf{t}_k} A_k(\alpha_k, \mathbf{t}_k), \quad (\text{S9})$$

which is consistent with the definition of  $\theta^*$  by eq. 19 of the main text.

Also note that step II-III correspond to the notion of *detector weighting*, introduced in the main text.

## Step IV

Step III resulted in  $\tau^\circ \equiv (\mathbf{t}_1^\circ, \dots, \mathbf{t}_K^\circ)$ , where  $k = 1, \dots, K$  and  $K = 10$ . As mentioned above, each  $\mathbf{t}_k^\circ$  is a function of  $b_k$  and so  $\tau^\circ$  is also a function of the vector  $(b_1, \dots, b_K)$  (it might be of interest that both functions are bijective). Therefore the constraint expressed by eq. S2 allows  $\tau^\circ$  to vary, so  $\tau^\circ$  corresponds to a set of 9 free parameters. This is equivalent to *class weighting*, which was introduced in the main text.

For each  $\gamma \in [0, 1]$  (eq. S2) the new framework defines the optimal parameter set  $\tau^* \equiv (\mathbf{t}_1^*, \dots, \mathbf{t}_K^*)$  as

$$\tau^* = \arg \max_{\tau^\circ} A(\alpha = \phi(\gamma), \tau^\circ), \quad (\text{S10})$$

where  $\phi$  is a relation transforming  $\gamma$  to  $\alpha$  (cf. eq. 19 of the main text).

Writing  $\mathbf{s}^* = ([s_1^{X_1}]^*, [s_1^{X_2}]^*, \dots, [s_K^{X_1}]^*, [s_K^{X_2}]^*)$  and  $\theta^* = (\tau^*, \mathbf{s}^*)$  completes the optimization process.

## Implementation of Step IV

For steps I-III it is straight forward to find an efficient search algorithm for the global solutions ( $\tau^\circ$  and  $\mathbf{s}^*$ ) but for step IV a heuristic approach was taken since this step involves 9 free parameters. Thus Eq. S10 was implemented as a slightly modified version of the differential evolution algorithm described on page 149 of Feoktistov V (2006) Differential Evolution, volume 5 of Springer Optimization and Its Applications. Springer US. Appendix A. This modified algorithm is presented below. To simplify notation the following conventions are introduced:  $\mathbf{t}_k^i \equiv [\mathbf{t}_k^\circ]^i$  and  $\tau \equiv \tau^\circ$ . These conventions also apply to Figure S1, which illustrates some properties of the algorithm.

---

**Algorithm 1:** Optimization with differential evolution

---

**Input:**  $\gamma$ , fraction of predicted pairs in  $|\Omega|$  total pairs  
// control input parameters  
**Input:**  $u$ , population size  
**Input:**  $d$ , diffusion constant  
**Input:**  $g$ , number of generations  
**Data:**  $U = \{\tau^1, \tau^2, \dots, \tau^u\}$ , population of  $u$  individuals  
**Data:**  $\tau^i = (\mathbf{t}_1^i, \dots, \mathbf{t}_K^i)$ , each individual  $\tau^i$  is a parameter set containing  $K$  thresholds  
 $\mathbf{t}_k^i \equiv [\mathbf{t}_k^o]^i$ , where for each  $i$  the definition of  $[\mathbf{t}_k^o]^i$  is given by eq. S8 and  $K$  is the number of substitution rate classes.  
**Data:**  $\tau^{\text{trial}}$ , depending on its fitness, the trial individual may change the population in each generation.  
**Function:** `CreateRandomIndividual(Constraint)`, to initialize the population  
**Function:**  $\text{Fitness}(\tau^i) = \rho^{\text{TP}}(\tau^i)$ , where  $\rho^{\text{TP}}(\tau^i)$  is the true positive rate (eq. 16 of the main text)  
**Function:** `CreateTrialIndividual( $\tau^i, U, d$ )`, creates a trial individual from  $\tau^i$ , by a mutation and a compensatory mutation, based on 3 other individuals of the population. See Algorithm 2 for details.  
**Output:**  $\tau^*$ , fittest individual (optimized parameter set)  
// initialize population  
// the number of all predicted pairs  $|P| \equiv \sum_k |P_k(\mathbf{t}_k)|$  is constrained (eq. S2)  
1 Constraint:  $|P_k(\mathbf{t}_k)| = \text{round}(\gamma \times |\Omega|)$  ;  
2  $\tau^1 \leftarrow \text{CreateRandomIndividual}(\text{Constraint})$  ;  
3  $\tau^* \leftarrow \tau^1$  ;  
4 **for**  $i = 2$  **to**  $u$  **do**  
5 |  $\tau^i \leftarrow \text{CreateRandomIndividual}(\text{Constraint})$  ;  
6 | **if**  $\text{Fitness}(\tau^i) > \text{Fitness}(\tau^*)$  **then**  
7 | |  $\tau^* \leftarrow \tau^i$  ;  
8 | **end**  
9 **end**  
// evolve population  
10 **for**  $l = 1$  **to**  $g$  **do**  
11 | **for**  $i = 1$  **to**  $u$  **do**  
12 | |  $\tau^{\text{trial}} \leftarrow \text{CreateTrialIndividual}(U, \tau^i, d)$  ;  
13 | | **if**  $\text{Fitness}(\tau^{\text{trial}}) > \text{Fitness}(\tau^i)$  **then**  
14 | | |  $\tau^i \leftarrow \tau^{\text{trial}}$  ;  
15 | | | **if**  $\text{Fitness}(\tau^{\text{trial}}) > \text{Fitness}(\tau^*)$  **then**  
16 | | | |  $\tau^* \leftarrow \tau^{\text{trial}}$  ;  
17 | | | **end**  
18 | | **end**  
19 | **end**  
20 **end**  
21 **return**  $\tau^*$  ;

---

---

**Algorithm 2:** CreateTrialIndividual( $U, \tau^i, d$ )

---

**Input:**  $U$ , population  
**Input:**  $\tau^i = (\mathbf{t}_1^i, \dots, \mathbf{t}_K^i)$ ,  $i$ th individual of population  
**Input:**  $d$ , diffusion constant  
**Output:**  $\tau^{\text{trial}} = (\mathbf{t}_1^{\text{trial}}, \dots, \mathbf{t}_K^{\text{trial}})$ , trial individual

// Mutation of  $\tau^i$  is based on randomly chosen individuals  $\tau^a, \tau^b, \tau^c$  and substitution rates  $p, q$

- 1 randomly select  $\tau^a, \tau^b, \tau^c \in U$  such that  $a \neq b \neq c \neq l$  ;
- 2 randomly select  $p, q$  such that  $1 \leq p, q \leq K$  and  $p \neq q$  ;

// The mutation uniquely determines the compensatory mutation under the constraint below

- 3  $\mathbf{t}_p^{\text{mut}} \leftarrow \mathbf{t}_p^a + d(\mathbf{t}_p^b - \mathbf{t}_p^c)$  ;  
// Ensure that the mutation does not affect number of all predicted pairs
- 4 Constraint:  $|P_p^{\text{trial}}(\mathbf{t}_p^i)| + |P_q^{\text{trial}}(\mathbf{t}_q^i)| = |P_p^{\text{trial}}(\mathbf{t}_p^{\text{mut}})| + |P_q^{\text{trial}}(\mathbf{t}_q^{\text{mut}})|$  ;
- 5  $\mathbf{t}_q^{\text{mut}} \leftarrow \text{CompensatoryMutation}(\text{Constraint}, \mathbf{t}_p^i, \mathbf{t}_q^i, \mathbf{t}_p^{\text{mut}})$  ;

// The trial individual is the mutated copy of  $\tau^i$

- 6  $\tau^{\text{trial}} \leftarrow \tau^i$  ;
- 7  $\mathbf{t}_p^{\text{trial}} \leftarrow \mathbf{t}_p^{\text{mut}}$  ;
- 8  $\mathbf{t}_q^{\text{trial}} \leftarrow \mathbf{t}_q^{\text{mut}}$  ;
- 9 **return**  $\tau^{\text{trial}}$  ;

---
